# Supplementary material for: Electrophysiological Activity of Primary Cortical Neuron-Glia Mixed Cultures
Source: MDPI journal article supplement (doi:10.3390/cells12050821), 2023-03-06
Supplement: s1 [file s1]

Supplementary Material

# Electrophysiological Activity of Primary Cortical Neuron-Glia Mixed Cultures

Noah Goshi <sup>1</sup>, Hyehyun Kim <sup>1</sup>, Gregory Girardi <sup>1</sup>, Alexander Gardner <sup>2</sup> and Erkin Seker <sup>2,\*</sup>

<sup>1</sup> Department of Biomedical Engineering, University of California – Davis, Davis CA 95616, USA

<sup>2</sup> Department of Electrical and Computer Engineering, University of California – Davis, Davis, CA 95616, USA

\* Correspondence: eseker@ucdavis.edu

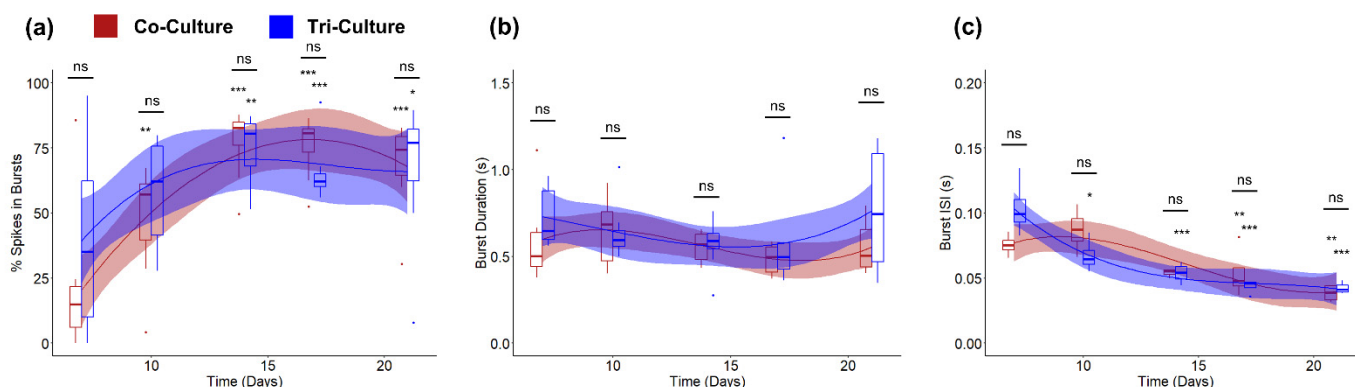

**Figure S1.** Comparisons of the (a) percent spikes in bursts, (b) burst duration, and (c) interspike interval within bursts between co-cultures (red) and tri-cultures (blue). The solid lines show the fitted linear mixed effects model (treating individual cultures as a random effect) with a b-spline basis. The shaded regions are the 95% confidence interval. An asterisk above an individual box indicates a significant difference of the estimated marginal means of the fitted curves between that timepoint and DIV 7 of the same culture type, while the bars indicate the significance between the co- and tri-culture at that timepoint ( $n = 8$ , from three independent dissections). \*  $p < 0.05$ , \*\*  $p < 0.01$ , \*\*\*  $p < 0.001$ , ns indicate no significant difference.

\*\*\*  $p < 0.001$ , ns indicate no significant difference.

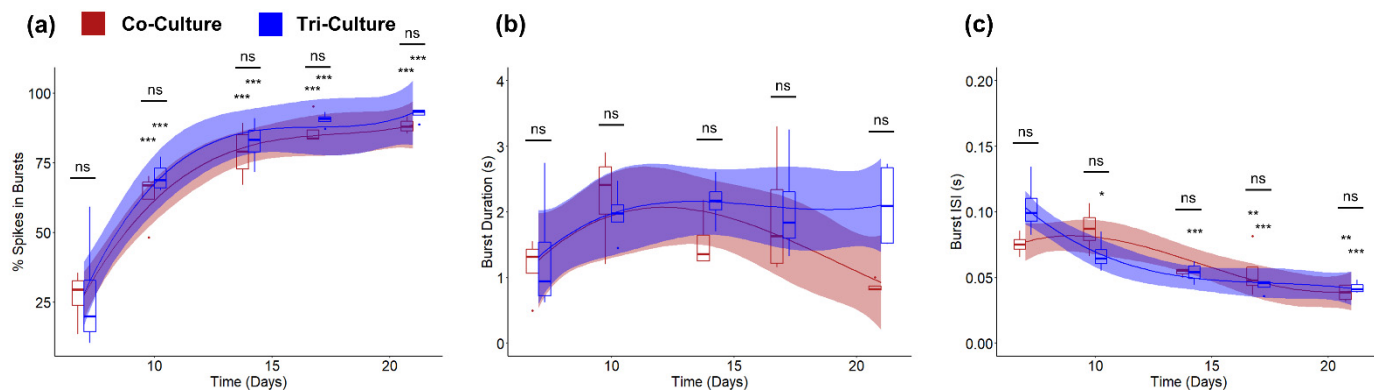

**Figure S2.** Comparisons of the (a) percentage of spikes in bursts, (b) burst duration, and (c) inter-spike interval within bursts between co-cultures (red) and tri-cultures (blue) cultured in a two-chambered microfluidic device. The solid lines show the fitted linear mixed effects model (treating individual cultures as a random effect) with a b-spline basis. The shaded regions are the 95% confidence interval. An asterisk above an individual box indicates a significant difference of the estimated marginal means of the fitted curves between that timepoint and DIV 7 of the same culture type, while the bars indicate the significance between the co- and tri-culture at that timepoint ( $n = 5$ , from two independent dissections). \*  $p < 0.05$ , \*\*  $p < 0.01$ , \*\*\*  $p < 0.001$ , ns indicate no significant difference.

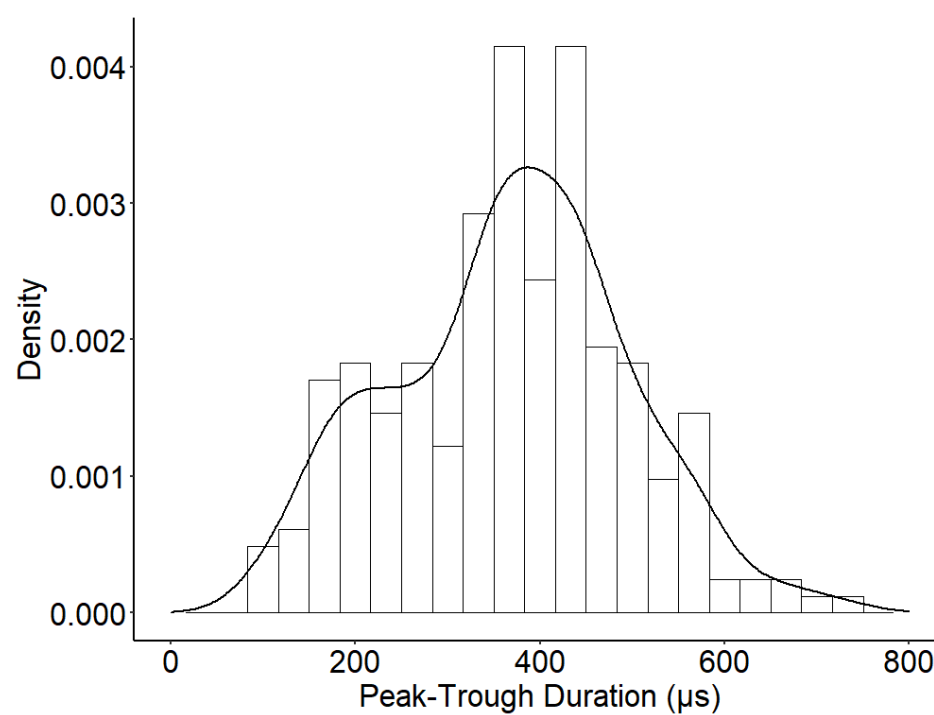

**Figure S3.** Density histogram of the peak-trough durations of the averaged spike waveforms from 249 units recorded from both co- and tri-cultures. We observe one peak at  $\sim 220 \mu\text{s}$  and the second at  $\sim 380 \mu\text{s}$ .

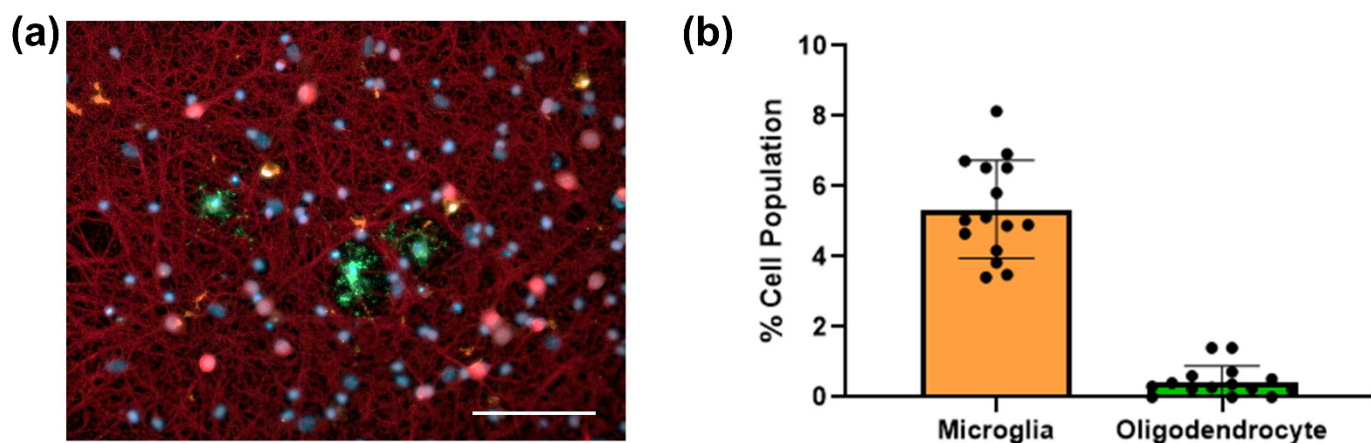

**Figure S4.** (a) Representative fluorescence image of the tri-culture at DIV21 showing the presence of microglia and mature oligodendrocytes. The cultures were stained for neurons - anti- $\beta$ III-tubulin (red), mature oligodendrocytes - anti-MBP (green), microglia - anti-Iba1 (orange), and the general nuclear stain DAPI (blue). (Scale bar = 100  $\mu$ m). (b) Percentage of the total cell population of microglia and mature oligodendrocytes. (Mean  $\pm$  SD,  $n = 3$  from one dissection). The individual points indicate the values of the technical replicates.

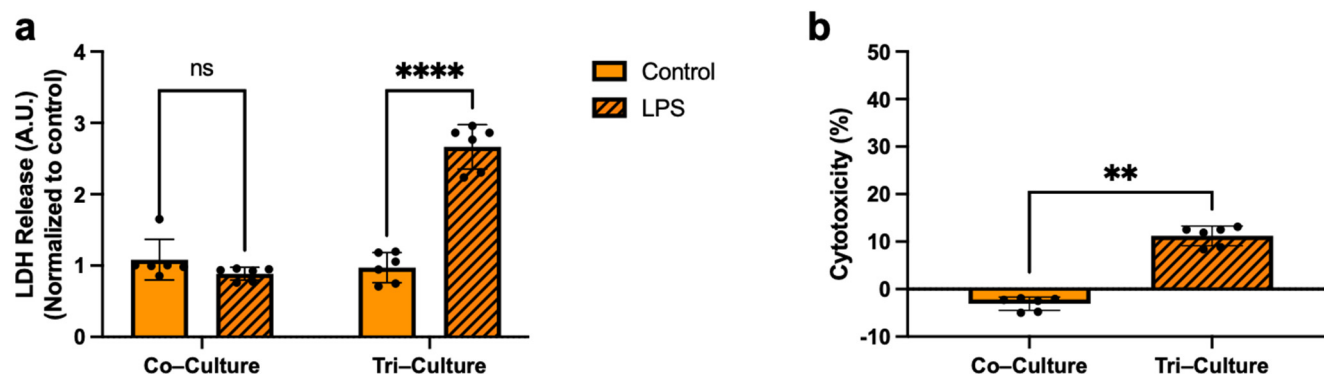

**Figure S5.** Comparing the change in cytotoxicity between the tri- and co-culture following a 72 h exposure to 5 µg/mL of LPS exposure at DIV 21. Lactate dehydrogenase (LDH) release-based cell viability assessment was conducted using CyQUANT LDH Cytotoxicity Assay Kit (ThermoFisher, Waltham, MA, USA), according to manufacturer's instructions. **(a)** Change in LDH release normalized to controls (vehicle) for each culture type. **(b)** Change in percent cytotoxicity scaled between control (vehicle) and 100% cytotoxicity (lysis buffer treatment). A two-way ANOVA was used to compare the influence of culture type and LPS treatment on cell viability. A Student's t-test was used to compare the differences in percent cytotoxicity between the tri- and co-culture at DIV 21. (Mean  $\pm$  SD,  $n = 3$  from one dissection). The individual points indicate the values of the technical replicates. \*\*  $p < 0.01$ , \*\*\*\*  $p < 0.0001$ , ns indicate no significant difference.

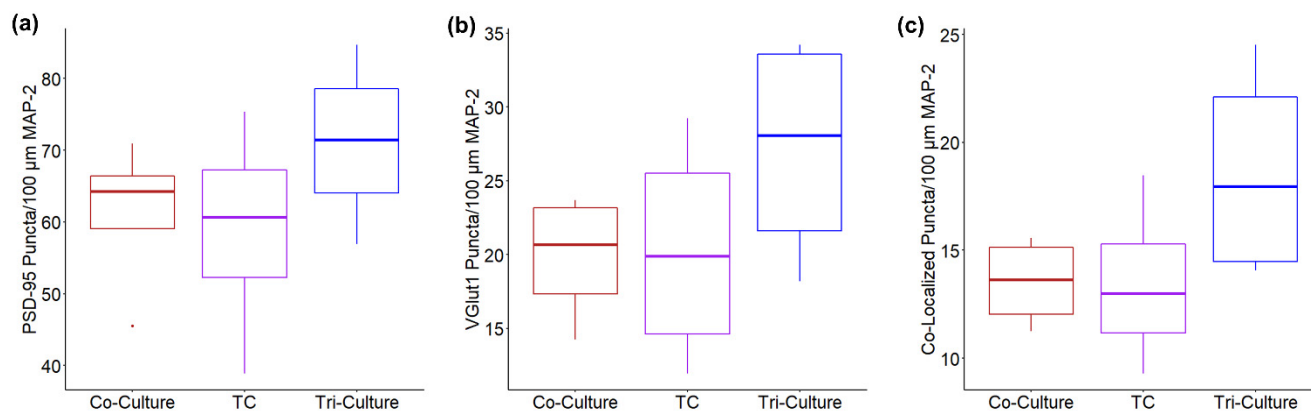

**Figure S6.** Comparison of the density of (a) PSD-95 puncta, (b) VGlut1 puncta, and (c) co-localized puncta between co-cultures, cultures maintained with co-culture media with the addition of TGF- $\beta$  (2 ng/mL) and cholesterol (1.5  $\mu$ g/mL) (TC), and tri-cultures at DIV 21. In all three cases a one-way ANOVA did not find a significant difference between the three culture types. However, qualitatively, the median values of the TC culture are closer to the co-culture than the tri-culture in all three conditions. ( $n = 4$ , from two independent dissections).
